# Supplementary material for: Trends in Global Tropospheric Ozone Inferred from a Composite Record of TOMS/OMI/MLS/OMPS Satellite Measurements and the MERRA-2 GMI Simulation
Source: Copernicus journal article supplement (doi:10.5194/acp-2018-716), 2018-12-05
Supplement: Supplementary file 1 [file acp-2018-716-supplement.pdf]

1 **SUPPORTING MATERIAL.**

2

3 **A. Validation and Adjustments Made to OMI/MLS TCO.**

4

5 An OMI instrumental data artifact known as the “row anomaly” affects the quality of level-1B  
6 radiance measurements, and subsequently the quality of the orbital level-2 and gridded level-3  
7 ozone measurements. The row anomaly is an instrumental blockage in the optical path that  
8 expanded greatly in late January 2009 to affect greater than one-third of all 60 scan positions for  
9 ozone retrieval.

10

11 The OMI standard total ozone product has extensive corrections made for the row anomaly  
12 problem, but we have found that for TCO there still remains a small error of ~0.5 to 1.0 DU over  
13 the Aura record. We have evaluated the OMI/MLS TCO product for the OMI row anomaly and  
14 have made corrections for this. Figure S1 compares monthly time series differences of  
15 OMI/MLS standard product TCO minus OMI/MLS row-isolated TCO (i.e., only OMI rows 3-18  
16 included for total column ozone in orbital measurements) (see figure caption). The result of this  
17 row anomaly evaluation is that the OMI standard total column ozone used to derive TCO has a  
18 small average artificial drift of ~+0.5 to +1.0 DU-decade<sup>-1</sup> due to the OMI row anomaly. An  
19 incremental change is visible around January 2009 in Figure S1 when the row anomaly problem  
20 became escalated. As a conservative approach we applied a mean -1.0 DU-decade<sup>-1</sup> adjustment  
21 to OMI/MLS TCO. This adjustment is relatively small compared to the ~+3 DU-decade<sup>-1</sup> or  
22 greater trends calculated over India/East Asia in Figure 1 for OMI/MLS TCO.

23

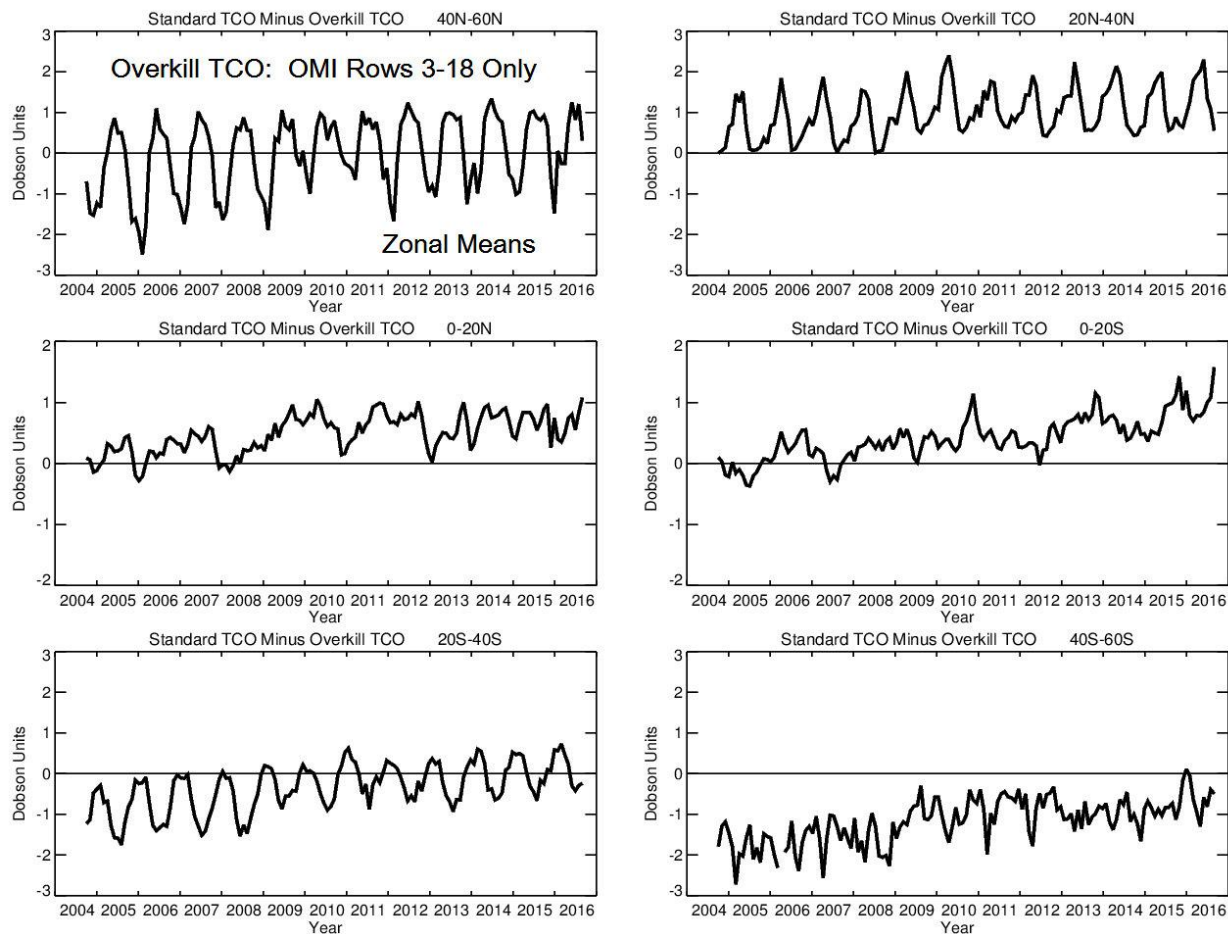

24  
25

26 **Figure S1.** Monthly time series differences of OMI/MLS standard TCO minus OMI/MLS row-  
 27 isolated TCO (i.e., only OMI rows 3-18 included for total column ozone for entire record) for  
 28 estimating artificial drift due to the row anomaly error in standard OMI total ozone  
 29 measurements. Differences are averaged over 20° latitude bands (indicated). These differences  
 30 indicate that the standard product TCO from OMI/MLS has an artificial drift varying from about  
 31 +0.5 to +1.0 DU-decade<sup>-1</sup> with a small incremental change visible around January 2009 when the  
 32 row anomaly problem became escalated.

33

34 We have compared the row anomaly adjusted OMI/MLS TCO with global ozonesondes for  
 35 several sites over the globe. A total of 29 ozonesonde stations were selected based on having a  
 36 sufficiently large number of daily ozone profiles for the comparisons during October 2004  
 37 through May 2016 (Figure S2). The number criterion was based on at least 50 (20) daily 1-1 co-

38 located matchups for the first and last 5-year periods for 12-month averages (June-September  
39 averages). The differences (final 5-year minus beginning 5-year average) invoked a t-test (e.g.,  
40 Wolf, 1962).  
41

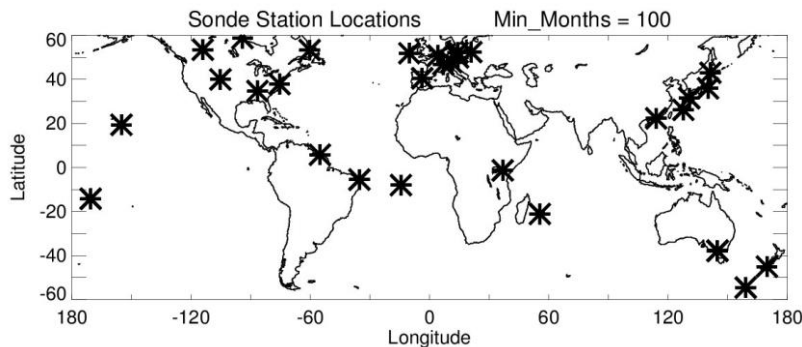

42  
43  
44 **Figure S2.** Locations for the ozonesonde stations for the ozonesonde measurements used to  
45 evaluate the OMI/MLS TCO product for potential drift and/or offset. Each station has at least  
46 100 months of measurements (and at least 3 daily profiles each of these months) covering the  
47 period October 2004 through May 2016.

48  
49 Figure S3 shows OMI/MLS TCO comparisons with ozonesonde TCO to test the OMI/MLS  
50 product for potential long-term measurement drift and mean offset. Nearly all ozonesonde  
51 measurements are from Electrochemical Concentration Cell (ECC) instruments. All co-located  
52 TCO for each of the 29 stations were first measured daily and then averaged over the beginning  
53 and ending 5-year records for October 2004 – May 2016 (see figure caption).

54  
55

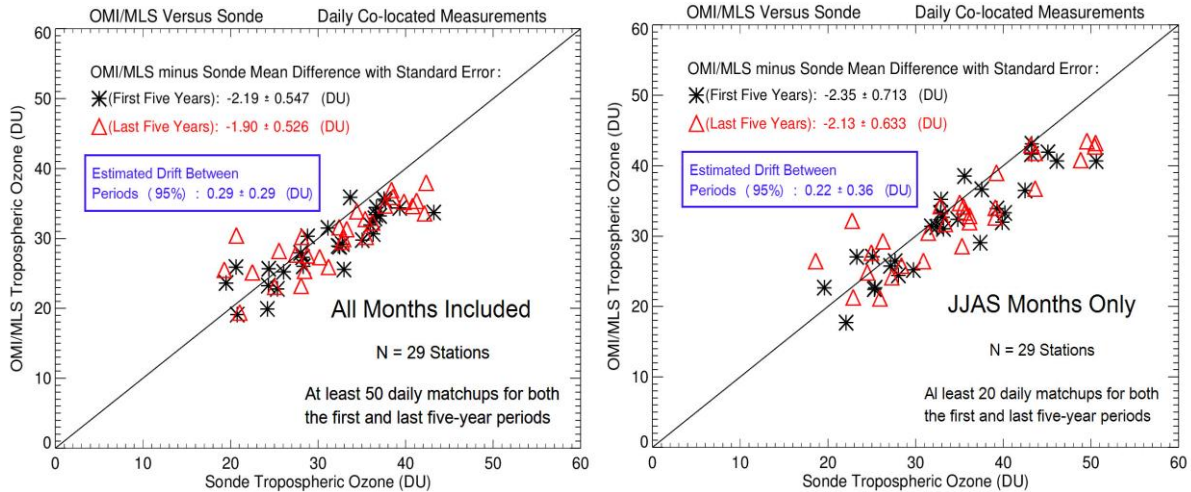

56

57

58 **Figure S3.** (Left) OMI/MLS TCO versus ozonesonde TCO for the 29 stations in the analysis.

59 The ozonesonde TCO measurements each day used the same NCEP WMO  $2\text{K}\text{-km}^{-1}$  lapse-rate

60 tropopause as used for OMI/MLS. The ozonesonde record of daily coincident TCO is 1 October

61 2004 to 31 May 2016. All OMI/MLS and ozonesonde measurements for each station were daily

62 and then averaged over the beginning 5-year record (black asterisks) and ending 5-year record

63 (red triangles). The estimated relative drift (OMI/MLS minus ozonesonde) including  $\pm 2\sigma$

64 between the beginning and ending 5-year periods is  $+0.29 \text{ DU} \pm 0.29 \text{ DU}$ . A two-sided t-test

65 was used for these difference calculations. (Right) Same as left panel, but including only daily

66 measurements for the months June-July-August-September (JJAS). Estimated drift for JJAS is

67  $+0.22 \text{ DU} \pm 0.36 \text{ DU}$ .

68

69 The main conclusion from Figure S3 is that according to the ozonesondes there is only a very

70 small positive drift detected in OMI/MLS TCO of around  $+0.2$  to  $+0.3 \text{ DU}$  between beginning

71 and ending 5-year records that is not statistically significant when based upon a difference t-test.

72 The ozonesondes also indicate that OMI/MLS TCO is too small by about  $2 \text{ DU}$ . We have

73 included a mean  $+2 \text{ DU}$  constant offset adjustment to the OMI/MLS TCO measurements based

74 on the ozonesondes.

75

76 We have also tested possible relative drift between OMI and MLS ozone retrievals by comparing

77 their independent measurements of SCO. Figure S4 in the left panel shows OMI SCO from the

78 CCD method (black solid curve) plotted with MLS SCO (red dotted curve). All values represent  
 79 monthly means and are averaged over the tropical Pacific (indicated). The right panel in Figure  
 80 S4 shows the difference of these two curves (MLS minus OMI) along with a low-pass filtering of  
 81 this same difference curve for visualization. This test implies that OMI and MLS ozone  
 82 measurements are well behaved over long record with no obvious relative drift other than  $\sim 0.5$   
 83 DU-decade<sup>-1</sup> which is not statistically significant. Most differences in Figure S4 are QBO  
 84 related with one instrument measuring the QBO signal in SCO at nadir (OMI) and the other from  
 85 limb (MLS).  
 86

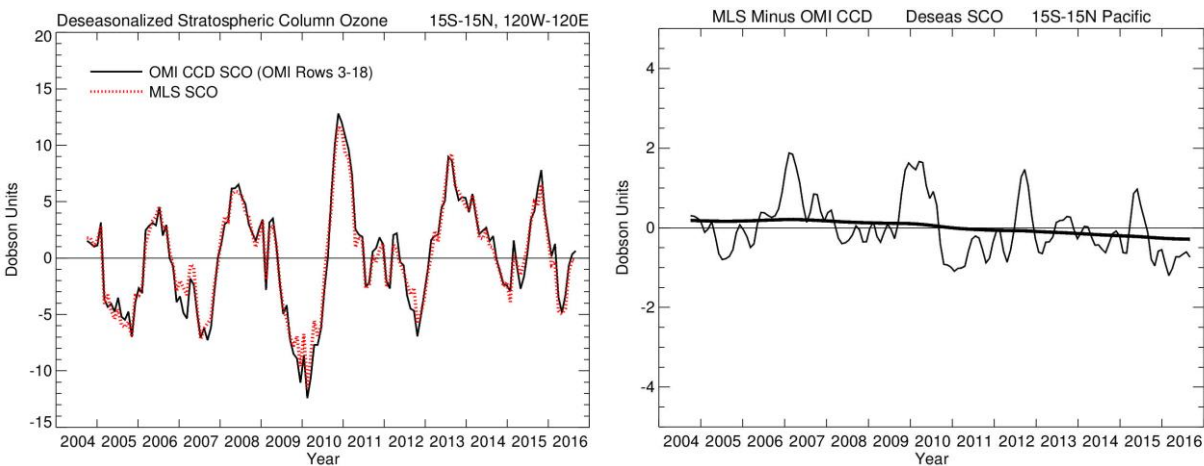

87  
 88  
 89 **Figure S4.** (Left) Monthly time series (in DU) of OMI SCO derived from the CCD method  
 90 (solid black curve) over-plotted with MLS SCO (dotted red curve) beginning October 2004. All  
 91 measurements were averaged over the tropical Pacific (indicated) where the CCD measurements  
 92 of SCO are optimal for comparing with MLS SCO. The OMI measurements used only OMI  
 93 scan rows 3-18 (out of a total of 60 rows for each side-to-side scan) to avoid OMI row-anomaly  
 94 problems with retrieved ozone. (Right) The time series difference of MLS SCO minus CCD  
 95 SCO (thin black curve) and a low-pass filtering of the difference curve (thick black curve).  
 96 There is no statistically significant drift measured between MLS and OMI SCO.

97  
 98 In summary, our cross-evaluations with ozonesondes and independent SCO measurements from  
 99 MLS and OMI, as well as the OMI row anomaly shows that the OMI/MLS TCO data product is  
 100 well behaved for the entire Aura time record for evaluating trends. Corrections made to the

101 OMI/MLS TCO were very small. These corrections included a +2 DU offset adjustment (via  
102 ozonesonde comparisons) and a conservative  $-1.0 \text{ DU-decade}^{-1}$  drift adjustment (via row  
103 anomaly analysis).

104

### 105 **B. OMPS Nadir-Mapper/Limb Profiler Tropospheric Ozone.**

106

107 An important yet small addition to this study is to show some evaluation of TCO derived from  
108 Suomi NPP OMPS measurements. We produced global monthly mean measurements of OMPS  
109 TCO for January 2012 through June 2017. OMPS TCO is measured similar to OMI/MLS TCO.  
110 OMPS v2.5 limb-profiler (LP) ozone profiles for all three combined slit measurements are first  
111 integrated vertically each day to determine SCO. The SCO fields are then filled in each day  
112 using 2D Gaussian + linear interpolation. The SCO is then subtracted from OMPS nadir-mapper  
113 v8.6 total ozone measurements to derive gridded TCO. An example of monthly-mean OMPS  
114 TCO for July 2016 is shown in Figure S5.

115

116

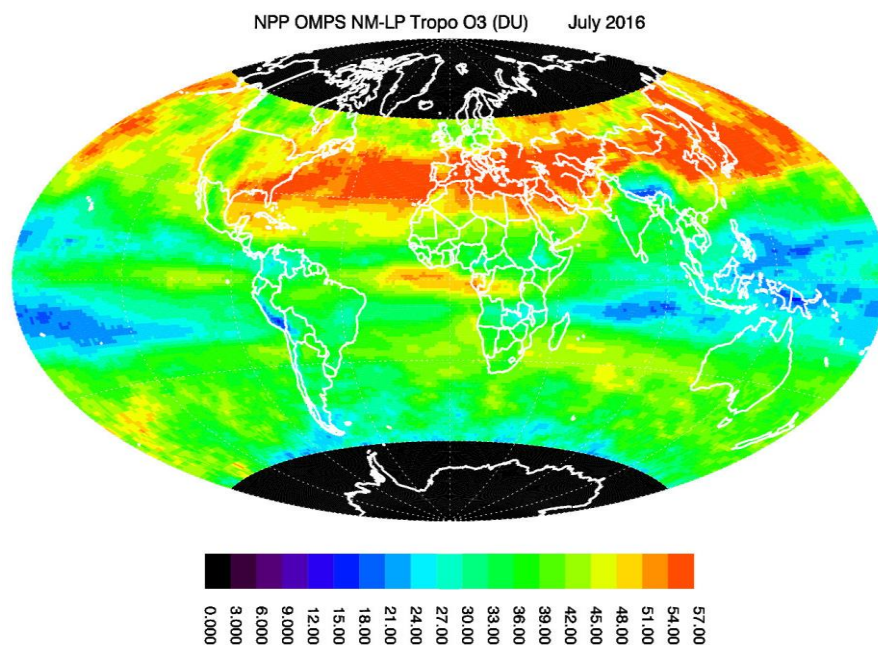

117

118

119 **Figure S5.** TCO (in DU) averaged for July 2016 from combined OMPS nadir-mapper and  
120 OMPS limb-profiler measurements (see text).

121  
122 Figure S6 shows differences in monthly zonal means for OMPS and OMI/MLS averaged over  
123 January 2012 through June 2017. A generally constant offset of about 4 DU (OMPS being  
124 higher) occurs over most of the useful latitude range. Following this +4 DU offset between  
125 OMPS and OMI/MLS, the OMPS tropospheric ozone was adjusted at all latitudes by -2 DU  
126 following the +2 DU ozonesonde offset applied to OMI/MLS TCO.

127

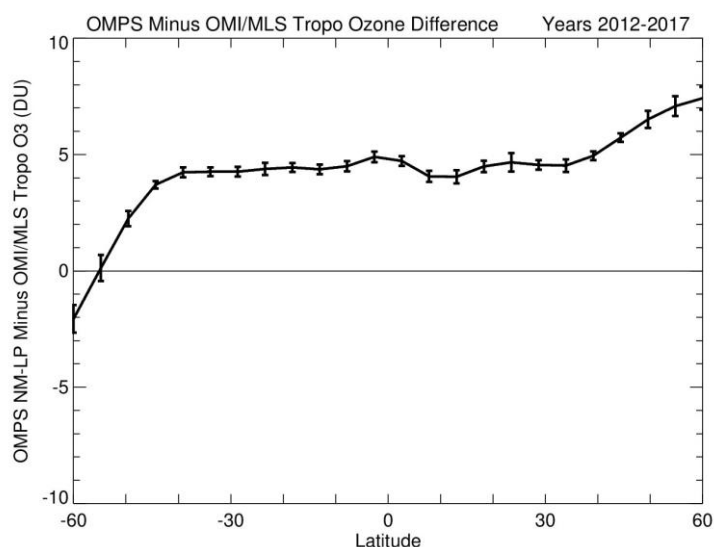

128  
129 **Figure S6.** Differences of monthly zonal-mean OMPS TCO minus OMI/MLS TCO for the data  
130 overlap period of January 2012 through June 2017.

131  
132 Figure S7 shows comparisons of time series for OMPS TCO (blue curves) and OMI/MLS TCO  
133 (dotted red curves) for selected sites. Included sites are Java, Brazil, Washington DC, and  
134 Beijing. In mid-latitudes the dominant variability is the seasonal cycle, but in the tropical  
135 latitudes there is considerable inter-annual change, in particular for Java due to ENSO events.

136

137

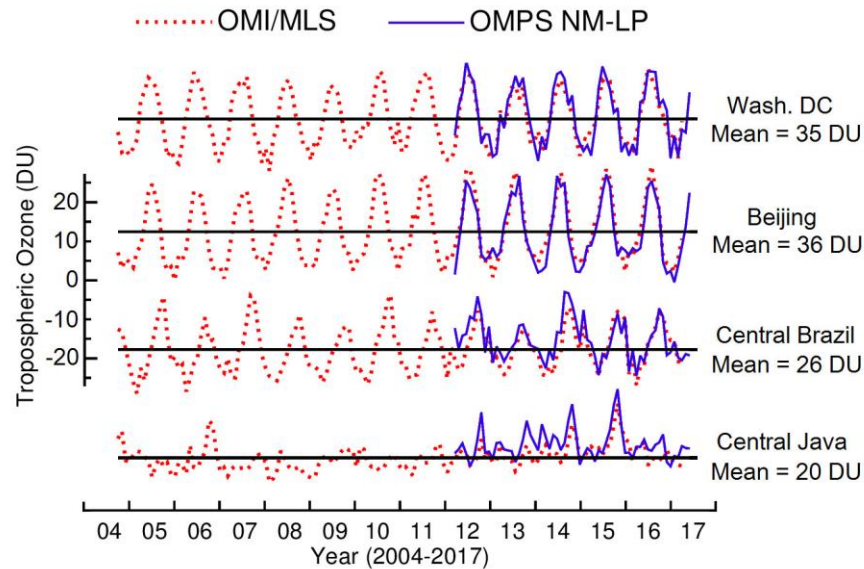

138  
 139 **Figure S7.** Monthly-mean time series of OMI/MLS TCO and OMPS TCO at several sites  
 140 plotted together following the offset adjustment of Figure S6.

141  
 142 **C. Validation of TOMS TCO Measurements.**

143  
 144 We noted in section 2 that the TOMS TCO measurements included validation assessments by  
 145 Ziemke et al. (2005, and references therein). For TOMS TCO the main difficulty with validating  
 146 against ozonesondes is obtaining a sufficient number and long record of good quality  
 147 ozonesonde data back to the 1970's and 1980's. Ziemke et al. (1998) compared CCD TCO for  
 148 the Nimbus-7 record (1979-1993) with ozonesondes that were mostly entirely of the Brewer-  
 149 Mast instrument design and had large profile correction factors (often ~30%). Those  
 150 comparisons were at best only useful for evaluating basic properties of seasonal cycles. Ziemke  
 151 et al. (2005) used SHADOZ ozonesonde comparisons for the Earth-Probe record from 1996-  
 152 2005. A large fraction of SHADOZ ozonesondes, particularly over the last decade, are of the  
 153 much more accurately-measuring ECC design. Figure S8 shows SHADOZ/TOMS comparisons  
 154 of TCO monthly time series.

155



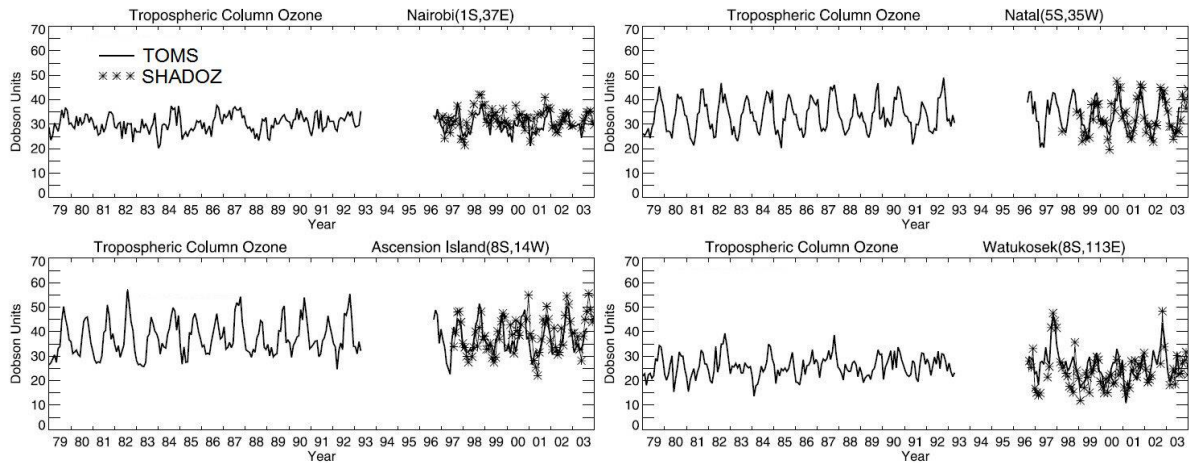

156  
 157 **Figure S8.** Coincident time series of TOMS CCD (dark solid curves) and SHADOZ (asterisks)  
 158 tropospheric column ozone in Dobson Units. The stations plotted are Nairobi, Natal, Ascension  
 159 Island, and Watukosek. This figure is adapted from Ziemke et al. (2005).

160  
 161 **D. Trend Comparisons Between Ozonesondes, OMI/MLS, and GMI Tropospheric Ozone.**

162  
 163 We calculated linear trends in column ozone from sondes for 2005-2016 and compared these  
 164 with the linear trends calculated from OMI/MLS and GMI TCO in Figure 1. Figure S9 shows  
 165 the ozonesonde stations sites for these comparisons. In total there were 27 sites based upon  
 166 minimum statistical conditions including at least a total of 2 ozonesondes per given month  
 167 extending over at least 8 years for the 12-year record. Most all of the ozonesonde measurements  
 168 are from ECC instruments that tend to be generally well calibrated over long record and between  
 169 different stations.

170  
 171 Figure S10 plots the trend comparisons. The ozonesonde trends in Figure S10 show large spread  
 172 in both sign and magnitude in the NH compared to either OMI/MLS or GMI trends which are  
 173 generally consistent between them everywhere except in the SH extra-tropics. In the SH extra-  
 174 tropics the ozonesondes indicate no viable trend, similar to GMI TCO which suggests that the  
 175 near-zero trends throughout the SH extra-tropics determined by GMI in Figure 1 are more  
 176 correct than OMI/MLS. It is noted however that the positive trends for OMI/MLS TCO in the  
 177 SH extra-tropics are primarily over remote ocean regions and not in vicinity of the sondes station  
 178 sites. In the tropics there is one (highlighted) station, Costa Rica, where the ozonesonde trend is

179 clearly negative and opposite the positive trends measured for both OMI/MLS and GMI TCO. A  
180 reason for the negative ozonesonde trends at Costa Rica relates to volcanic SO<sub>2</sub> within the sonde  
181 detector during the latter years that reduced the detected ozone in the 2-7 km altitude range (e.g.,  
182 Witte et al., 2018).

183  
184 A main result from the ozonesonde trend evaluation in Figure S10 is that the short Aura record  
185 combined with limited measurements for the ozonesondes precludes any definitive quantitative  
186 trend determination and trend comparisons with OMI/MLS and GMI TCO. Yet, there is still a  
187 general consensus in Figure S10 of an overall increase in tropospheric ozone from OMI/MLS,  
188 GMI, and the ozonesondes.

189  
190

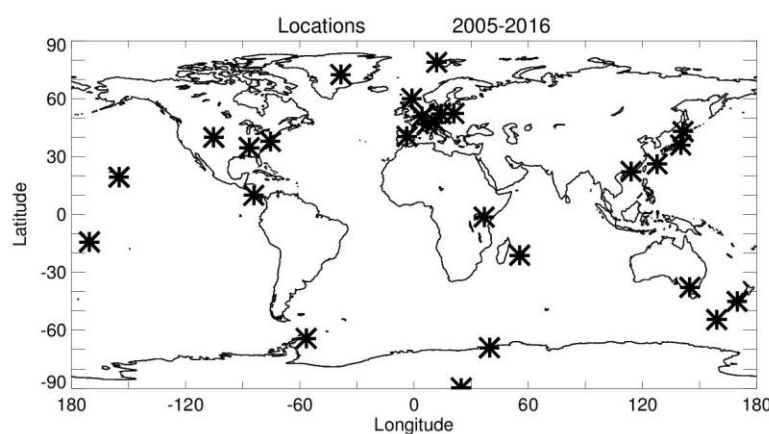

191  
192  
193 **Figure S9.** Ozonesonde station sites (27 in total) for ozonesonde linear trend calculations (see  
194 text).  
195

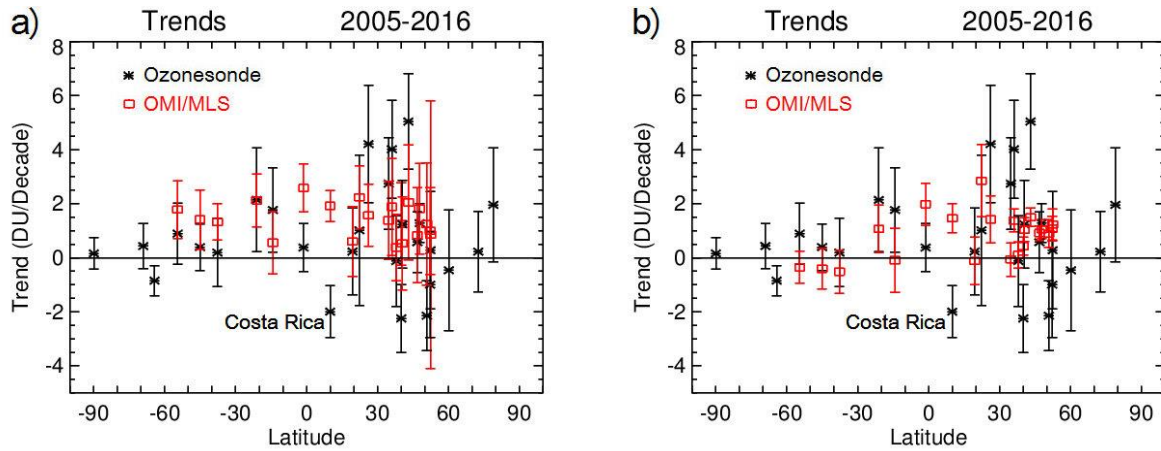

196  
197

198 **Figure S10.** (a) Linear trends in tropospheric ozone for 2005-2016 calculated for OMI/MLS  
 199 monthly mean TCO (red squares) and ground-to-8 km column ozone from ozonesondes (black  
 200 asterisks). The trends for OMI/MLS TCO used the MLR method discussed in section 2.3 while  
 201 trends for the ozonesondes were calculated from a line fit regression using the daily profile  
 202 measurements. All calculated trends include  $\pm 2\sigma$  statistical uncertainties. (b) Same as (a) but  
 203 instead for MERRA-2 GMI monthly mean TCO.

204  
205  
206
